# Supplementary material
Source: PubMed Central journal article supplement (PMC3257902)
Supplement: mmc1.pdf [file mmc1.pdf]

Supplemental Data

Exome Sequencing Identifies *SLCO2A1* Mutations  
as a Cause of Primary Hypertrophic Osteoarthropathy

Zhenlin Zhang, Weibo Xia, Jinwei He, Zeng Zhang, Yaohua Ke, Hua Yue, Chun Wang, Hao Zhang, Jiemei Gu, Weiwei Hu, Wenzhen Fu, Yunqiu Hu, Miao Li, and Yujuan Liu

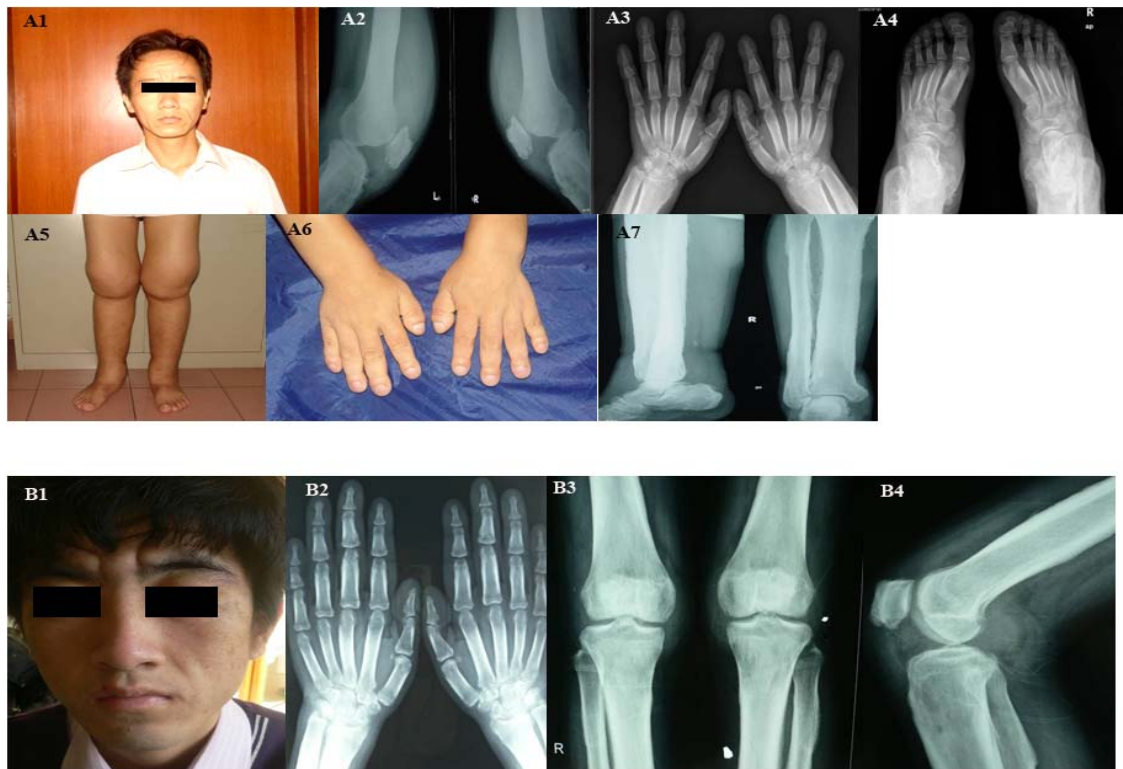

**Figure S1. Clinical images of affected individuals (P2 and P3) from pedigrees family 2 (A) and family 3 (B)**

The images show the thickening and furrowing of the facial skin (A1 and B1) and clubbing of the fingernails and toenails (A2 and A5). Hand radiographs show the loss of normal tabulation of the metacarpals and phalanges, cortical thickening of the metacarpals and proximal and middle phalanges as well as marked soft-tissue swelling (A3 and B2). Feet radiographs show cortical thickening and acro-osteolysis (A4). The knee images show marked swelling, and the radiographs show periosteal hyperostosis of the knee region with patellar sclerosis and sclerosis of both the distal femur and tibiofibula (A5-7 and B3 and B4). All images are published with permission from the patients.

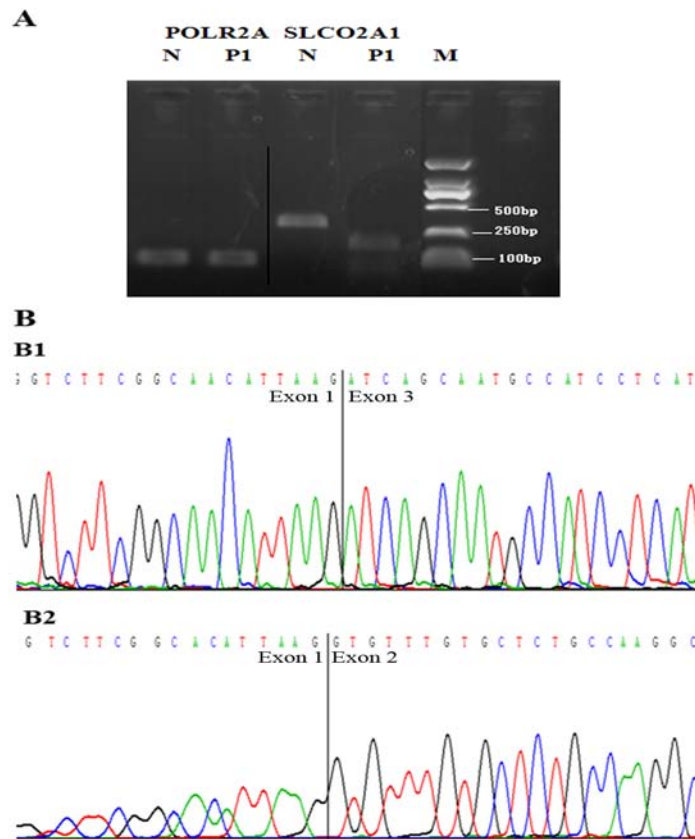

**Figure S2. mRNA expression and cDNA analysis by RT-PCR and sequencing in family1-P1 with *SLCO2A1* c.97-1G>A mutation**

Total RNA was extracted from the conchal cartilage of family1-P1 and articular cartilage of the knee of control individual, respectively, and then subjected to reverse transcription (RT) with the PrimeScript 1st stand cDNA synthesis kit (Takara). PCR amplification was performed to produce cDNA fragments spanning the c.97-1G>A mutation with primers 5' -TCCCAGGGCAGCGACACCTCTACT-3' and 5' -CGGAGAGGAAGTGTGGGAGGGTGA-3', and a 119bp fragment of human *POLR2A* by primers 5' -CCCCCAAAGGCTCAACCTACTC-3' and 5' -GTGCCCTCAGTTCTCCTCGTCA-3'.

(A) Electrophoresis of RT-PCR products. The expected 340bp fragment was only seen in the control individual whereas an extra short 202bp fragment was found in the affected individual. M: DNA marker; N: control individual; P1: family1-P1. (B) Analysis of cDNA sequencing. cDNA sequencing demonstrated the skipping of exon 2 in family1-P1 (B1), and normal sequence in control individual (B2).

**Table S1. An overview of the whole exome sequencing data production**

| <b>Exome Capture</b>                              | <b>Family1-P1</b> |
|---------------------------------------------------|-------------------|
| Initial bases in target                           | 37,640,396        |
| Initial bases near target                         | 57,236,802        |
| Initial bases in or near target                   | 94,877,198        |
| Total effective reads                             | 20,553,554        |
| Total effective yield (Mb)                        | 1,784.61          |
| Average read length (bp)                          | 86.83             |
| Effective sequence in target (Mb)                 | 1,262.10          |
| Effective sequence near target (Mb)               | 188.81            |
| Effective sequence in or near target (Mb)         | 1,450.91          |
| Fraction of effective bases in target             | 70.70%            |
| Fraction of effective bases in or near target     | 81.30%            |
| Average sequencing depth over target              | 33.53             |
| Average sequencing depth near target              | 3.3               |
| Mismatch rate in the target region                | 0.37%             |
| Mismatch rate in all of the effective sequence    | 0.39%             |
| Bases covered in target                           | 36,854,069        |
| Coverage of the target region                     | 97.90%            |
| Bases covered near target                         | 27,825,307        |
| Coverage of flanking regions                      | 48.60%            |
| Fraction of target covered at least 20×           | 57.30%            |
| Fraction of target covered at least 10×           | 78.90%            |
| Fraction of target covered at least 4×            | 92.30%            |
| Fraction of flanking regions covered at least 20× | 3.70%             |
| Fraction of flanking regions covered at least 10× | 9.80%             |
| Fraction of flanking regions covered at least 4×  | 22.50%            |

**Table S2. A summary of the SNPs from an exome capture sample**

| <b>Exome Capture</b>                                     | <b>Family1-P1</b> |
|----------------------------------------------------------|-------------------|
| Number of genomic positions for calling SNPs             | 106,163,831       |
| Number of high-confidence genotypes                      | 63,403,381        |
| Number of high-confidence genotypes in the target region | 36,119,062        |
| Number of known SNP sites in the target region           | 155,125           |
| Coverage of population SNPs in the target region         | 141760 (91.38%)   |
| Total number of SNPs                                     | 31,738            |
| Synonymous coding                                        | 7,871             |
| Missense                                                 | 6,677             |
| Nonsense                                                 | 51                |
| Read through                                             | 4                 |
| Splice site                                              | 320               |
| Introns                                                  | 15,179            |
| 5' UTRs                                                  | 539               |
| 3' UTRs                                                  | 909               |
| Intergenic                                               | 188               |

**Table S3. Direct identification of the causal gene for Family1-P1 by exome sequencing**

| <b>Filter</b>              | <b>Family1-P1 (whole / homozygous)</b> |
|----------------------------|----------------------------------------|
| Total number of SNPs       | 31,738                                 |
| NS/SS in the coding region | 7038 / 3136                            |
| NS/SS not in dbSNP129      | 718 / 46                               |
| NS/SS not in Hg18          | 614 / 43                               |
| NS/SS not in 1000 genome   | 472 / 28                               |
| NS/SS not in YanHuang      | 468 / 28                               |

**Table S4. Identified 28 genes containing homozygous mutations in Family1-P1 by exome sequencing**

| <b>Gene name</b> | <b>MIM number</b> | <b>Mutation</b>              |
|------------------|-------------------|------------------------------|
| <i>AMBRA1</i>    | 611359            | N952S                        |
| <i>OR4C46</i>    | 614273            | H120R                        |
| <i>OR6Q1</i>     | -                 | A190T                        |
| <i>PYGM</i>      | 608455            | R642L                        |
| <i>ATG2A</i>     | -                 | R1212H                       |
| <i>NPAS4</i>     | 608554            | P207S                        |
| <i>DPP3</i>      | 606818            | L183S                        |
| <i>NADSYN1</i>   | 608285            | E322K                        |
| <i>KRTAP5-7</i>  | -                 | C36S                         |
| <i>SERPINH1</i>  | 600943            | A63V                         |
| <i>GNPTAB</i>    | 607840            | R1191H                       |
| <i>STAB2</i>     | 608561            | L96H                         |
| <i>ALDH1L2</i>   | 613584            | L577V                        |
| <i>IFT81</i>     | 605489            | M83I                         |
| <i>KRTAP9-3</i>  | -                 | Q20K                         |
| <i>KRT37</i>     | 604541            | Q235X                        |
| <i>ABCA7</i>     | 605414            | R1885H                       |
| <i>NCLN</i>      | 609156            | K157Q                        |
| <i>LILRB3</i>    | 604820            | H61D                         |
| <i>TFCP2L1</i>   | 609785            | Y249C                        |
| <i>CCDC74B</i>   | -                 | N104D                        |
| <i>PTPN18</i>    | 606587            | T251A                        |
| <i>SLCO2A1</i>   | 601460            | c.9797-1G>A, Splice mutation |
| <i>MAGEC1</i>    | 300223            | P232S                        |
| <i>MAGEA9B</i>   | 300764            | R295G                        |
| <i>MAGEA9</i>    | 300342            | R295G                        |

|                |        |       |
|----------------|--------|-------|
| <i>ITIH5L</i>  | -      | L846F |
| <i>SHROOM2</i> | 300103 | A898V |

---
